# Supplementary material for: Overexpression of Laminin 5γ2 Chain Correlates with Tumor Cell Proliferation, Invasion, and Poor Prognosis in Laryngeal Squamous Cell Carcinoma
Source: Hindawi journal article supplement (doi:10.1155/2022/7248064), 2022-10-15
Supplement: f1 [file 7248064.f1.pdf]

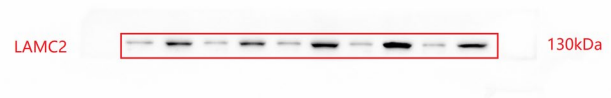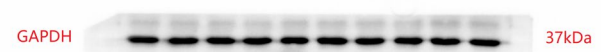

Supplementary files Fig 1. The LAMC2 and GAPDH protein bands are corresponding the original band of Fig. 1A in the manuscript.

LAMC2 130kDa

GAPDH 37kDa

Supplementary files Fig 2. The LAMC2 and GAPDH protein bands are corresponding the original band of Fig. 2B in the manuscript.



LAMC2 130kDa

A Western blot image showing a single row of protein bands. The bands are dark and of varying intensity. A red rectangular box highlights the second band from the left. The label 'LAMC2' is on the left and '130kDa' is on the right.

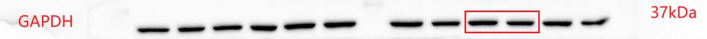

GAPDH 37kDa

A Western blot image showing a single row of protein bands. The bands are dark and of varying intensity. A red rectangular box highlights the second band from the right. The label 'GAPDH' is on the left and '37kDa' is on the right.

Supplementary files Fig 3. The LAMC2 and GAPDH protein bands are corresponding the original band of Fig. 2D in the manuscript.



LAMC2 130kDa

A Western blot image showing a single row of protein bands. The bands are dark and of varying intensity. A red rectangular box highlights the rightmost band. The label 'LAMC2' is on the left and '130kDa' is on the right.



GAPDH 37kDa

A Western blot image showing a single row of protein bands. The bands are dark and of varying intensity. A red rectangular box highlights the rightmost band. The label 'GAPDH' is on the left and '37kDa' is on the right.

Supplementary files Fig 4. The LAMC2 and GAPDH protein bands are corresponding the original band of Fig. 2F in the manuscript.

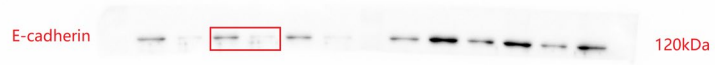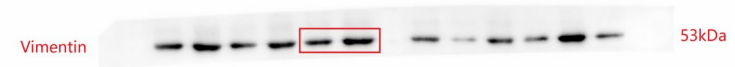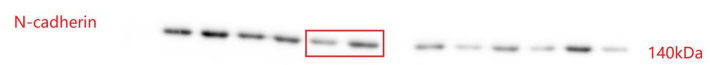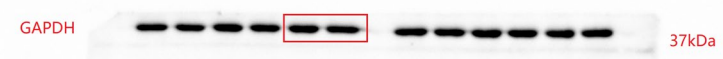

Supplementary files Fig 5. The The E-cadherin, N-cadherin, Vimentin and GAPDH protein bands are corresponding the original band of Fig. 5A in the manuscript.

E-cadherin 120kDa

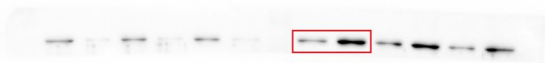

N-cadherin 140kDa

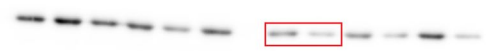

Vimentin 53kDa

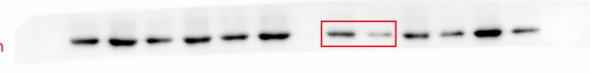

GAPDH 37kDa

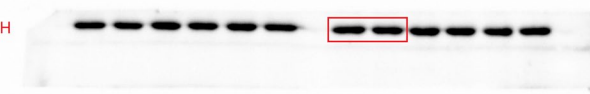

Supplementary files Fig 6. The E-cadherin, N-cadherin, Vimentin and GAPDH protein bands are corresponding the original band of Fig. 5B in the manuscript.

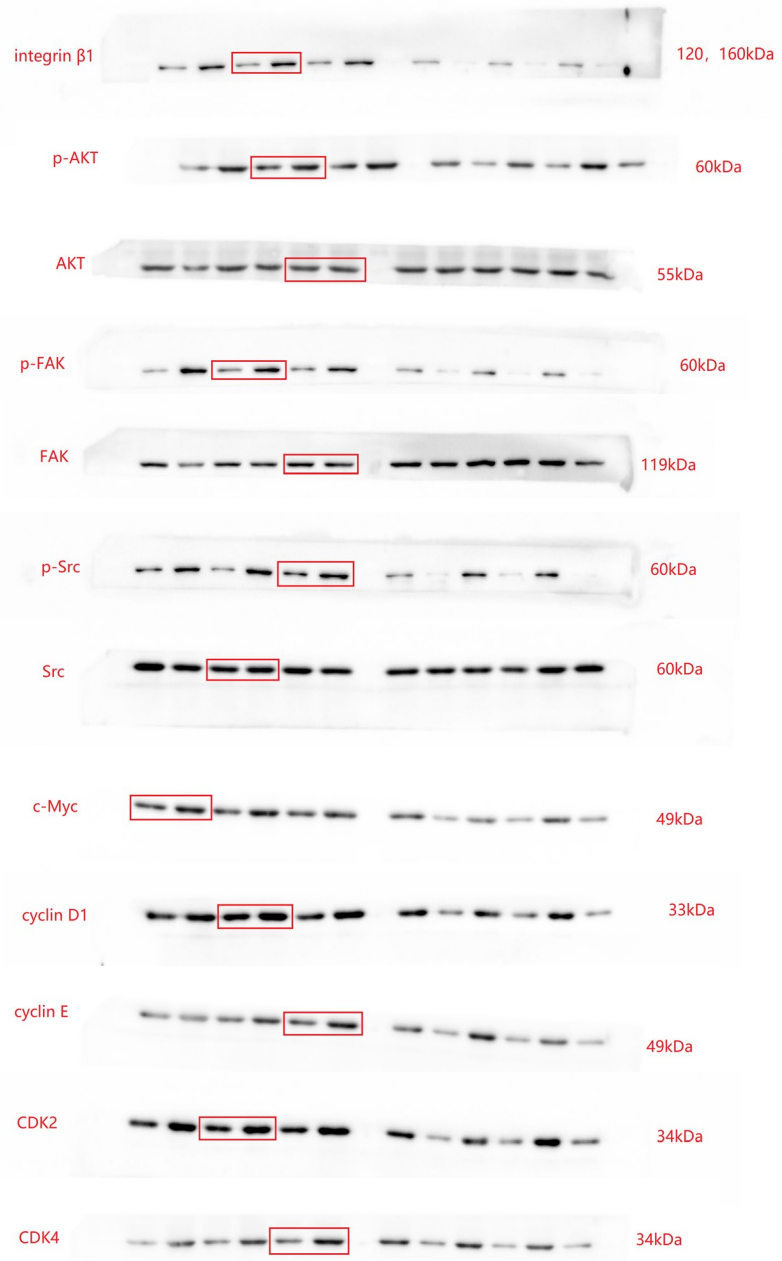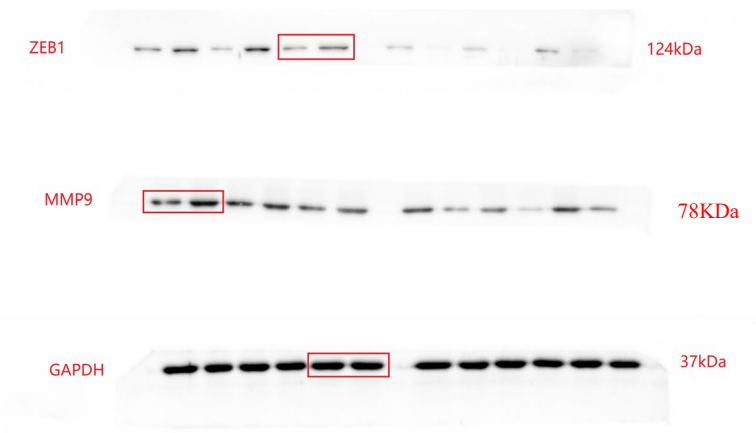

Supplementary files Fig 7. The integrin $\beta$ 1, p-AKT, AKT, p-FAK, FAK, p-Src, src, c-Myc, cyclin D1, cyclin E, CDK2, CDK4, ZEB1, MMP9 and GAPDH protein bands are corresponding the original band of Fig. 6A in the manuscript.

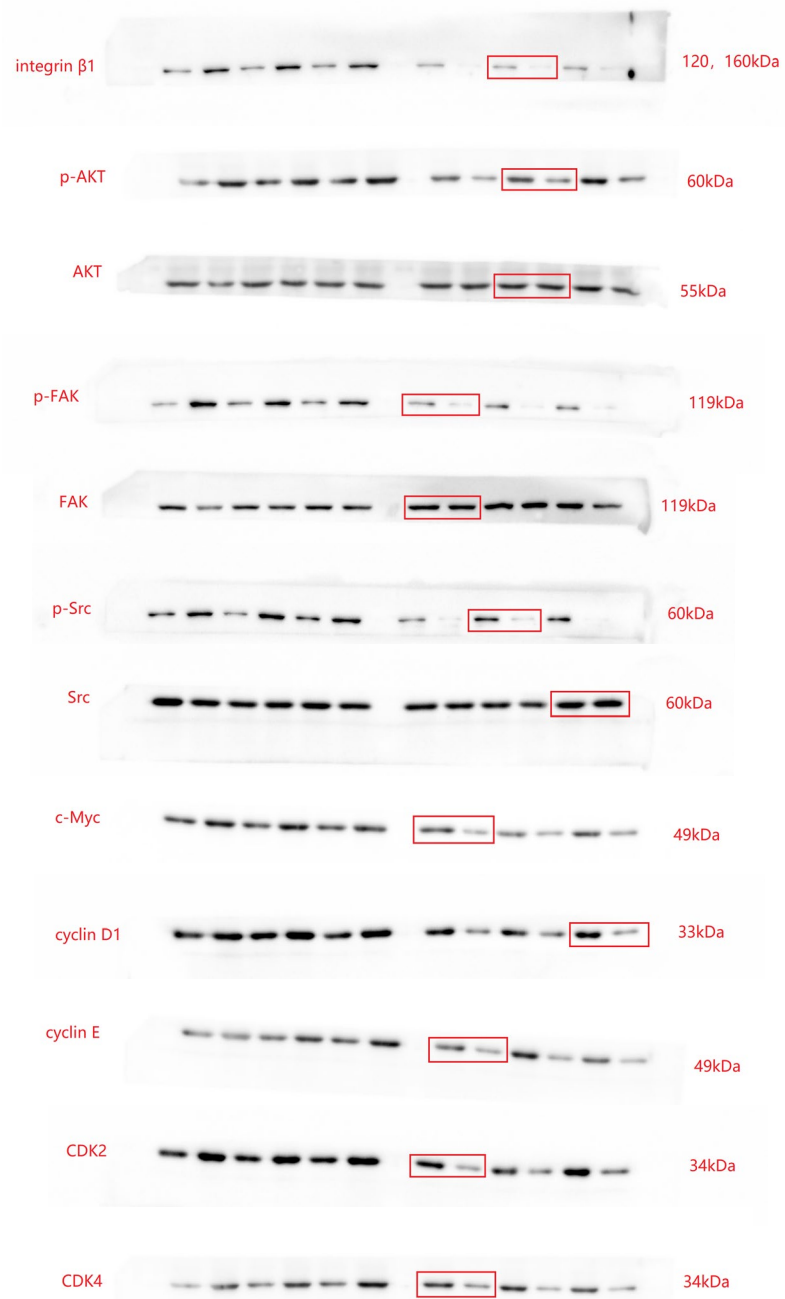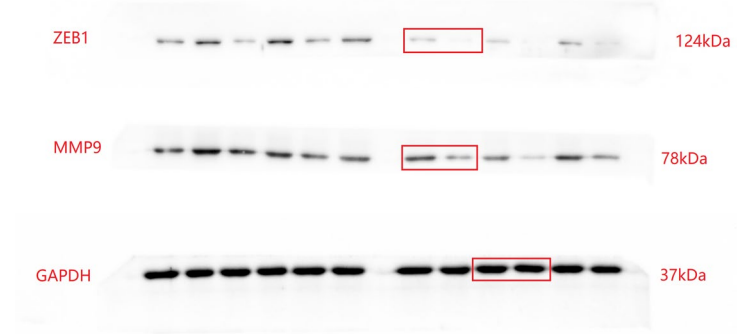

Supplementary files Fig 8. The integrin $\beta$ 1, p-AKT, AKT, p-FAK, FAK, p-Src, src, c-Myc, cyclin D1, cyclin E, CDK2, CDK4, ZEB1, MMP9 and GAPDH protein bands are corresponding the original band of Fig. 6B in the manuscript.



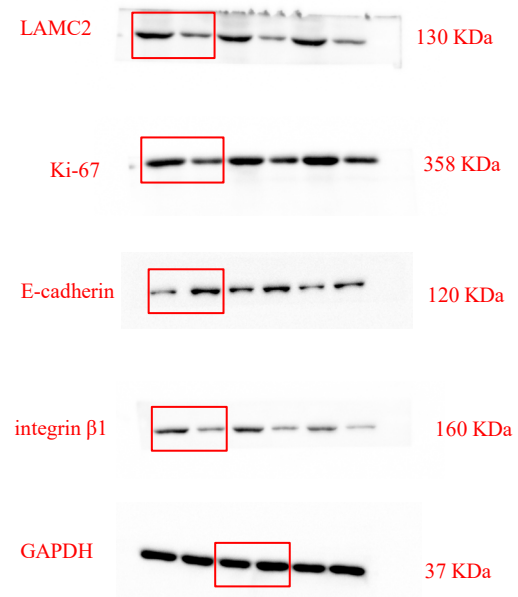

Supplementary files Fig 9. The LAMC2, Ki-67, E-cadherin and integrin $\beta$ 1 protein bands are corresponding the original band of Fig. 8 in the manuscript.
